# Supplementary material
Source: Royal Society of Chemistry journal article supplement (doi:10.1039/d6nr00167j)
Supplement: d6nr00167j1.pdf [file d6nr00167j1.pdf]

## Supporting Information for

### “Magnetic Skyrmion Arrangement Tuning by Surface Acoustic Waves”

Shouzhe Dong<sup>1,2</sup>, Changqing Guo<sup>1,2</sup>, Ke Xu<sup>1,2</sup>, Chen Liang<sup>1,2</sup>, Chengchao Hu<sup>3</sup>, Letao Yang<sup>1,2</sup>,  
Jing Wang<sup>1,2</sup> and Houbing Huang<sup>1,2\*</sup>

<sup>1</sup> School of Materials Science and Engineering, Beijing Institute of Technology, Beijing 100081, PR  
China

<sup>2</sup> School of Interdisciplinary Science, Beijing Institute of Technology, Beijing, 100081, PR China

<sup>3</sup> Aerospace and Informatics Domain, Beijing Institute of Technology, Zhuhai, 519088, PR  
China

\*Corresponding author: hbhuang@bit.edu.cn (Houbing Huang)

#### **This PDF file includes:**

Methods

Figures S1-S14

## Methods

**Phase field simulation:** In this phase-field model, the magnetization field  $\mathbf{M} = M_s(m_1, m_2, m_3)$  is used to characterize the magnetic domain structure, where  $m_i$  ( $i = x, y, z$ ) represents the components of the unit magnetization vector  $\mathbf{m}$  along the local crystallographic axes. The saturation magnetization is denoted by  $M_s$ . The evolution of the magnetization configuration is governed by the Landau-Lifshitz-Gilbert (LLG) equation, which captures the time-dependent dynamics of the magnetic domains<sup>1,2</sup>:

$$(1 + \alpha^2) \frac{\partial \mathbf{M}}{\partial t} = -\gamma_0 \mathbf{M} \times \mathbf{H}_{\text{eff}} - \frac{\gamma_0 \alpha}{M_s} \mathbf{M} \times (\mathbf{M} \times \mathbf{H}_{\text{eff}}) \quad \backslash * \text{MERGEFORMAT (1)}$$

In the formula 1,  $\alpha$  is the damping constant,  $\gamma_0$  is the gyromagnetic ratio, and  $\mathbf{H}_{\text{eff}}$  is the effective magnetic field, which can be described by the following equation:

$$\mathbf{H}_{\text{eff}} = \frac{-1}{\mu_0 M_s} \frac{\delta F_{\text{tot}}}{\delta \mathbf{m}} \quad \backslash * \text{MERGEFORMAT (2)}$$

In the formula 2,  $\mu_0$  and  $F_{\text{tot}}$  denote vacuum permeability and total free energy density, respectively. The total free energy density can be written as:

$$F_{\text{tot}} = F_{\text{anis}} + F_{\text{demag}} + F_{\text{zeem}} + F_{\text{exch}} + F_{\text{dmi}} + F_{\text{elas}} + F_{\text{mel}} + F_{\text{kin}} \quad \backslash * \text{MERGEFORMAT (3)}$$

In the formula 3,  $F_{\text{anis}}$ ,  $F_{\text{zeem}}$ ,  $F_{\text{demag}}$ ,  $F_{\text{exch}}$ ,  $F_{\text{dmi}}$ ,  $F_{\text{elas}}$ ,  $F_{\text{mel}}$  and  $F_{\text{kin}}$  are the magnetocrystalline anisotropy energy density, zeeman energy density, demagnetization energy density, exchange energy density, Dzyaloshinskii-Moriya interaction (DMI) energy density, elastic energy density and magnetoelastic coupling energy density and kinetic energy density, respectively. The volume of the anisotropy energy density is given by<sup>3</sup>

$$F_{\text{anis}} = K_1(1 - m_3^2) + K_2(1 - m_3^2)^2 \quad \backslash * \text{ MERGEFORMAT (4)}$$

In the formula 4,  $m_3$  denotes the  $M_z$  component, where  $K_1$  and  $K_2$  are the uniaxial anisotropy constants. The demagnetization energy density of a system can be written as:

$$F_{\text{demag}} = -\frac{1}{2}\mu_0 M_s \mathbf{H}_{\text{dem}} \cdot \mathbf{m} \quad \backslash * \text{ MERGEFORMAT (5)}$$

In the formula 5,  $\mathbf{H}_{\text{dem}}$  is the demagnetization field, determined by the long-range interaction among the magnetic moments in the system, which is obtained at each evolution step by solving the magnetostatic equilibrium equation:

$$\nabla \cdot (\mathbf{H}_{\text{dem}} + \mathbf{M}) = 0 \quad \backslash * \text{ MERGEFORMAT (6)}$$

The Zeeman energy density, also known as the external magnetic field energy density, which can be written as:

$$F_{\text{zeem}} = -\mu_0 M_s \mathbf{H}_{\text{ext}} \cdot \mathbf{m} \quad \backslash * \text{ MERGEFORMAT (7)}$$

In the formula 7,  $\mathbf{H}_{\text{ext}}$  is the external field.

The exchange energy density is determined by the spatial variation of the magnetization orientation and can be described as:

$$F_{\text{exch}} = -A(\nabla \mathbf{m})^2 \quad \backslash * \text{ MERGEFORMAT (8)}$$

In the formula 8,  $A$  is employed to describe the nearest-neighbor interaction coefficients between two spins. The DMI energy density is given by:

$$F_{\text{dmi}} = D(m_3 \nabla \cdot \mathbf{m} - \mathbf{m} \cdot \nabla m_3) \quad \backslash * \text{ MERGEFORMAT (9)}$$

In the formula 9,  $D$  represents the homogenous effective DMI constant. The elastic energy density can be described as:

$$F_{\text{elas}} = \frac{1}{2} \sum_{i,j,k,l} c_{ijkl} \varepsilon_{kl} \varepsilon_{ij} \quad \backslash * \text{MERGEFORMAT (10)}$$

where  $\varepsilon_{ij}$  and  $c_{ijkl}$  are the total strain components and the stiffness constants, ( $i, j, k, l = 1, 2, 3$ ).

The magnetoelastic coupling energy density can be described as<sup>4-6</sup>:

$$F_{\text{mel}} = B_1 \sum_i m_i^2 \varepsilon_{ii} + B_2 \sum_{i \neq j} m_i m_j \varepsilon_{ij} \quad \backslash * \text{MERGEFORMAT (11)}$$

In the formula 11,  $B_1$  and  $B_2$ , the magnetoelastic coupling constants, are related to the magnetostriction constants  $\lambda_{100}$  and  $\lambda_{111}$  through the following relationships<sup>7,8</sup>:

$$B_1 = -\frac{3}{2} \lambda_{100} (c_{11} - c_{12}), \quad B_2 = -3 \lambda_{111} c_{44} \quad \backslash * \text{MERGEFORMAT (12)}$$

The strain matrix is given by:

$$\begin{pmatrix} \varepsilon_{xx} & \varepsilon_{xy} & \varepsilon_{xz} \\ \varepsilon_{yx} & \varepsilon_{yy} & \varepsilon_{yz} \\ \varepsilon_{zx} & \varepsilon_{zy} & \varepsilon_{zz} \end{pmatrix} = \begin{pmatrix} \varepsilon_{rr}^s \frac{x^2}{r^2} \cos kr \cos \omega t & 0 & -\varepsilon_{rz}^s \frac{x^2}{r^2} \sin kr \cos \omega t \\ 0 & \varepsilon_{rr}^s \frac{y^2}{r^2} \cos kr \cos \omega t & -\varepsilon_{rz}^s \frac{y^2}{r^2} \sin kr \cos \omega t \\ -\varepsilon_{rz}^s \frac{x^2}{r^2} \sin kr \cos \omega t & -\varepsilon_{rz}^s \frac{y^2}{r^2} \sin kr \cos \omega t & \varepsilon_{zz}^s \cos kr \cos \omega t \end{pmatrix} \quad \backslash * \text{MERGEFORMAT}$$

In the formula 13,  $r = \sqrt{x^2 + y^2}$  is the radial coordinate,  $x$  and  $y$  represents the horizontal and vertical distances from the center of the nanoisland.  $k$  and  $\omega$  are the wave vector and the angular frequency of the SAW, respectively. The radial strain  $\varepsilon_{rr} = \varepsilon_{xx} + \varepsilon_{yy}$ ,  $\varepsilon_{rr}^s$ ,  $\varepsilon_{rz}^s$ , and  $\varepsilon_{zz}^s$  represent some coefficients of the matrix components. The radial sinusoidal strain oscillates exclusively along the radial direction, and points on the same circumference exhibit no tangential displacement, thus, the shear strain  $\varepsilon_{xy}$  is set to zero. During the calculations, the strain is assumed to be uniformly distributed along the azimuthal direction (i.e., exhibiting circumferential symmetry).

The kinetic energy density can be expressed as<sup>9</sup>

$$F_{\text{kin}} = \frac{\rho \left\| \frac{\partial \mathbf{u}}{\partial t} \right\|^2}{2} \quad \backslash * \text{MERGEFORMAT (14)}$$

In the formula 14,  $\rho$  is the mass density and  $\mathbf{u}$  the mechanical displacement. Assuming that the elastic equilibrium condition holds at each evolution step, the elastodynamic equation of motion is given by

$$\rho \frac{\partial^2 \mathbf{u}}{\partial t^2} + \eta \frac{\partial \mathbf{u}}{\partial t} = \nabla \cdot \boldsymbol{\sigma} + f_{\text{tot}} \quad \backslash * \text{MERGEFORMAT (15)}$$

In the formula 15,  $\eta$  is a phenomenological damping parameter and  $f_{\text{tot}}$  is the total body force acting on the material. The description of key SAW and strain parameters is as follows :

|                                             |                                         |                                                            |                                                               |                                         |
|---------------------------------------------|-----------------------------------------|------------------------------------------------------------|---------------------------------------------------------------|-----------------------------------------|
| $B_1$ (J/m) <sup>6,10,11</sup>              | $B_2$ (J/m) <sup>6,10,11</sup>          | Wavelength $\lambda$ (nm)<br>( $2\pi/k$ ) <sup>10,11</sup> | Frequency $f$ (GHz)<br>( $w/2\pi$ ) <sup>10,12</sup>          | $\mathcal{E}_{rr}^s$ <sup>6,10,11</sup> |
| $1 \times 10^7$                             | $1 \times 10^7$                         | 30 ~ 60                                                    | 0.17                                                          | 0.09 ~ 0.128                            |
| $\mathcal{E}_{zz}^s$ <sup>6,10,11</sup>     | $\mathcal{E}_{rz}^s$ <sup>6,10,11</sup> | Crystal types of<br>LiNbO <sub>3</sub> <sup>6,10-14</sup>  | Propagation velocity<br>of SAW (m/s)<br><sup>6,10,11,13</sup> | Modes of SAW <sup>6,10,11</sup>         |
| 0.009 ~ 0.0128                              | 0.0032 ~ 0.0064                         | Y-cut                                                      | 3765                                                          | Rayleigh wave                           |
| Mass Density $\rho$<br>(kg/m <sup>3</sup> ) | Damping<br>parameter $\eta$             | $\lambda_{100}$ <sup>6,10,11</sup>                         | $\lambda_{111}$ <sup>6,10,11</sup>                            | $c_{11}$ (GPa) <sup>6,10,11</sup>       |
| $8 \times 10^3$                             | 0                                       | $-4.6 \times 10^{-5}$                                      | $-4.6 \times 10^{-5}$                                         | 309                                     |
| $c_{12}$ (GPa) <sup>6,10,11</sup>           | $c_{44}$ (GPa) <sup>6,10,11</sup>       |                                                            |                                                               |                                         |
| 165                                         | 72                                      |                                                            |                                                               |                                         |

**Table 1** Description of Key SAWs and Strain Parameters

### Neural network:

**Dataset:** The data comes from the modified CIFAR-10 dataset. The CIFAR-10 dataset includes 60000 color images with a size of 32×32-pixels (50000 for training and 10000 for

testing). The color of each pixel is represented by three channels, and the image is divided into 10 different classes.

**Weight:** The measured magnetization component  $M_z$  is first normalized to the range of -1 to +1, and each synaptic weight to this interval. In the implementation, weights are stored as 32-bit floating-point numbers, and during forward propagation, each weight is replaced by the closest corresponding magnetization component value. After computing the loss, gradients are back-propagated and weights are updated for the next forward pass. To ensure correct gradient computation despite the non-differentiable weight-replacement operation, a straight-through estimator (STE) is employed to approximate gradients through the quantization process.

**Training details:** Our experiments are implemented using the PyTorch framework. Both networks are trained for 200 epochs with a batch size of 128 on an NVIDIA GeForce RTX 4070Ti GPU, employing the cross-entropy loss and the SGD optimizer (momentum = 0.9, weight decay =  $5 \times 10^{-4}$ ). The initial learning rate is set to 0.1 and is halved at the 100th and 160th epochs.

**Supplementary Note 1: The size of skyrmions under an out-of-plane (+z) magnetic field of 500 mT**

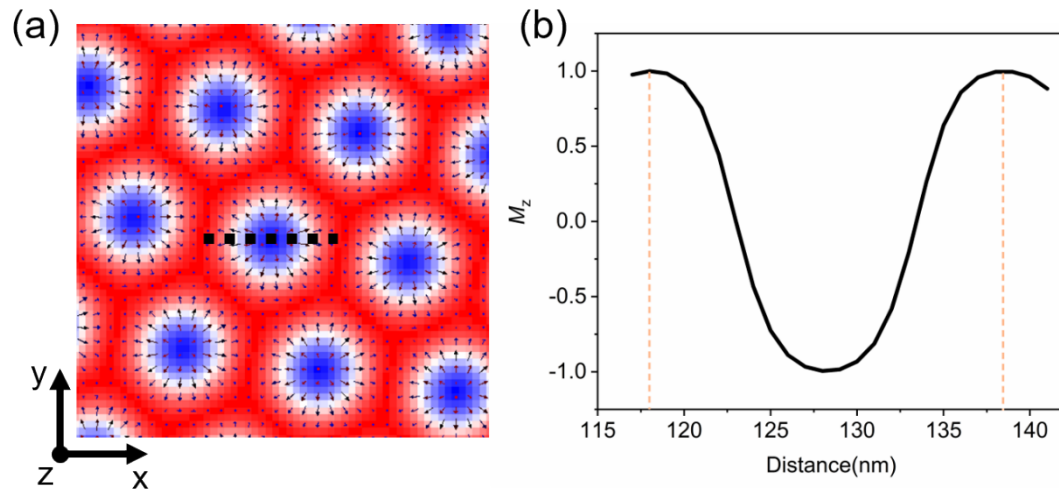

**Fig. S1** Determination of skyrmion dimensions. (a) Local distribution of the metastable domain configuration under an out-of-plane (+z) external field of 500 mT without SAW excitation. (b) Variation of the  $M_z$  component along the black dashed line.

**Supplementary Note 2: Effect of DMI strength on the skyrmion rearrangement behavior under SAW excitation.**

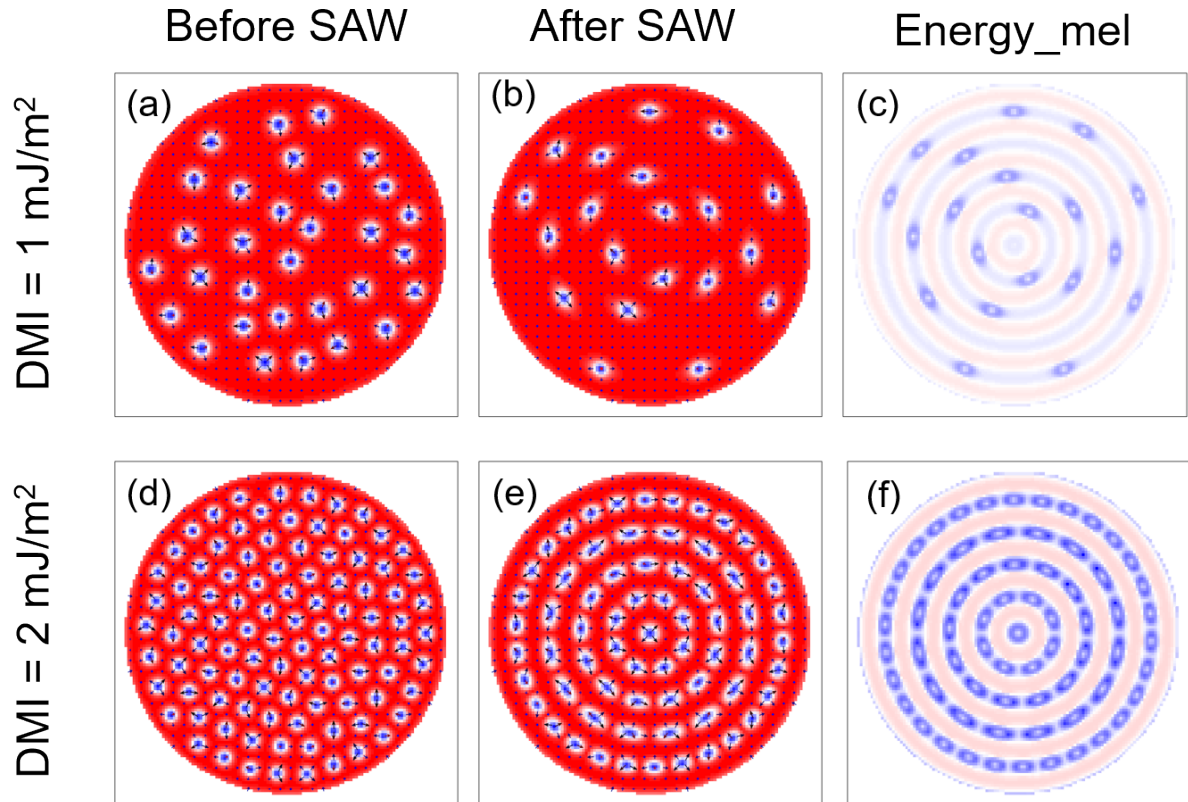

**Fig. S2** Effect of DMI strength on the skyrmion rearrangement behavior under SAW excitation.

(a)–(c) Skyrmion configurations before and after SAW excitation, and the corresponding magnetoelastic energy density distribution at  $t = 9.36$  ns, for  $D = 1$  mJ/m<sup>2</sup>. **d–f** The same sequence for  $D = 2$  mJ/m<sup>2</sup>.

**Supplementary Note 3: Skyrmion rearrangement induced by SAW excitation with a radial strain amplitude of 0.001 under different external magnetic fields.**

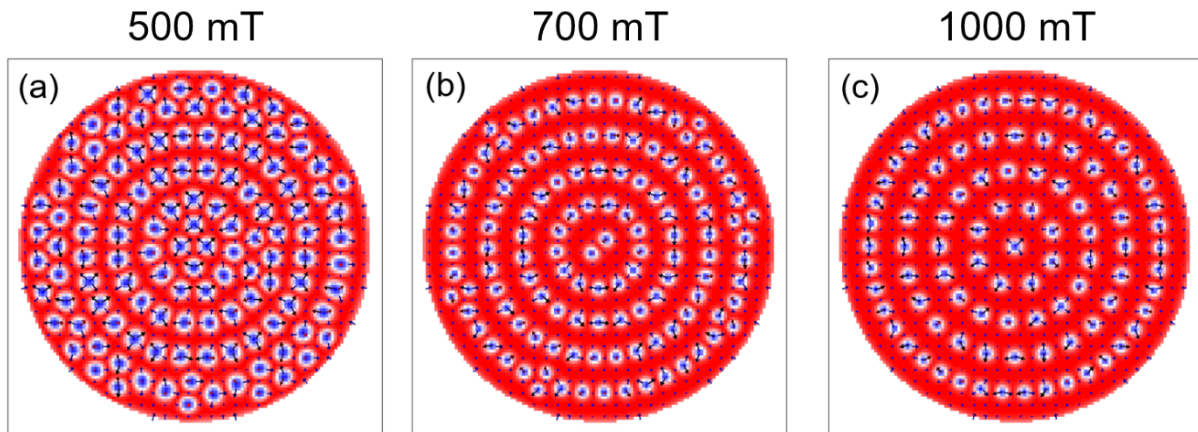

**Fig. S3** Skyrmion rearrangement induced by SAWs excitation with a radial strain amplitude of 0.001 under external magnetic fields of (a) 500 mT, (b) 600 mT and (c) 1000 mT.

**Supplementary Note 4: Skyrmion rearrangement induced by SAW excitation under different temperature.**

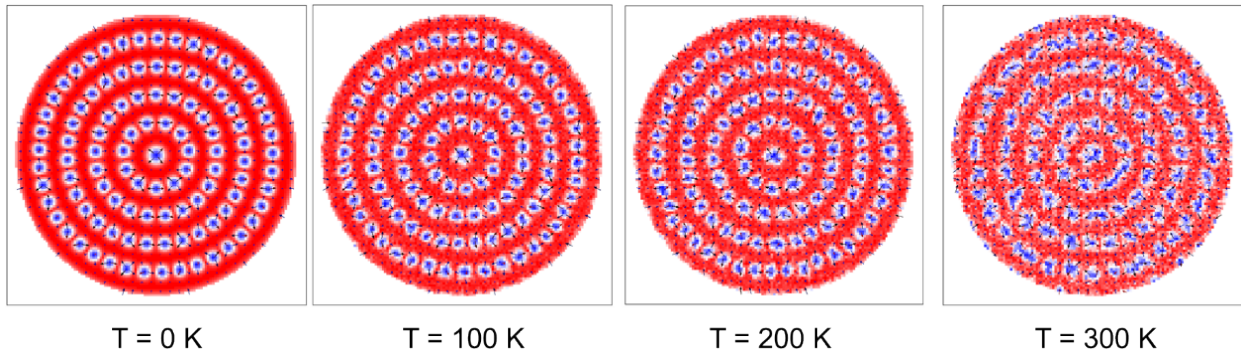

**Fig. S4** Effect of temperature on SAW-driven skyrmion rearrangement. Snapshots are taken at  $t = 9.36\text{ ns}$  under an external field of  $500\text{ mT}$  and a strain amplitude of  $0.128$  for various temperatures.

**Supplementary Note 5: Strain distribution of [Co/Pd]<sub>n</sub> multilayer nano-islands at t = 9.36 ns**

**ns**

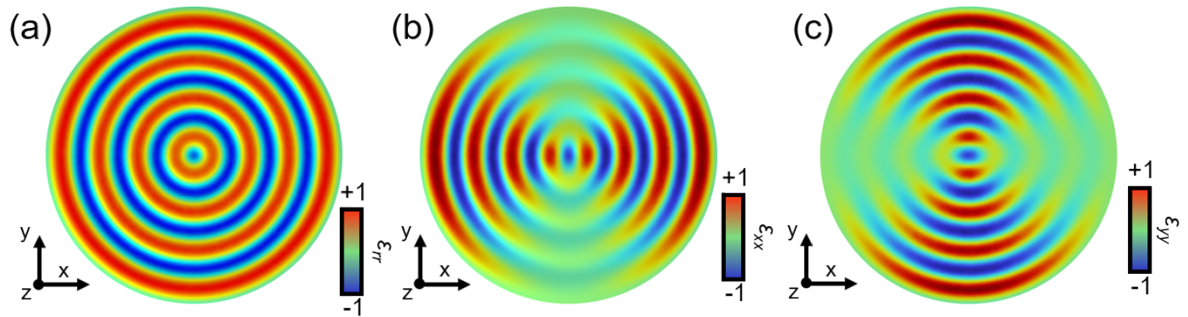

**Fig. S5** (a)  $\epsilon_{rr}$ , (b)  $\epsilon_{xx}$  and (c)  $\epsilon_{yy}$  strain distribution of [Co/Pd]<sub>n</sub> multilayer nano-islands at t = 9.36 ns.

**Supplementary Note 6: Temporal evolution of the energy density under nonuniform strain**

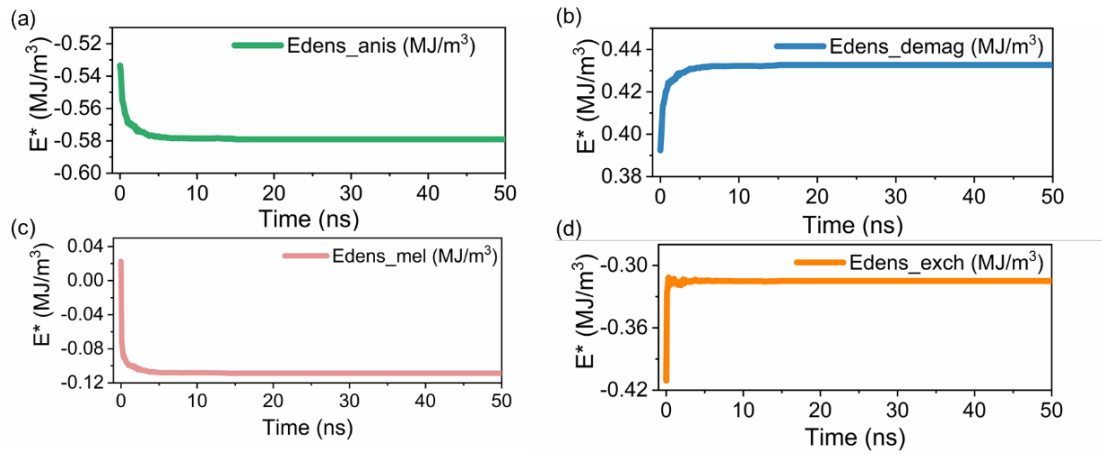

**Fig. S6** Temporal evolution of the energy density under nonuniform strain: (a) magnetocrystalline anisotropy energy density, (b) demagnetization energy density, (c) magnetoelastic coupling energy density, and (d) exchange energy density.

**Supplementary Note 7: Temporal evolution of the energy density changes relative to their initial states under nonuniform strain**

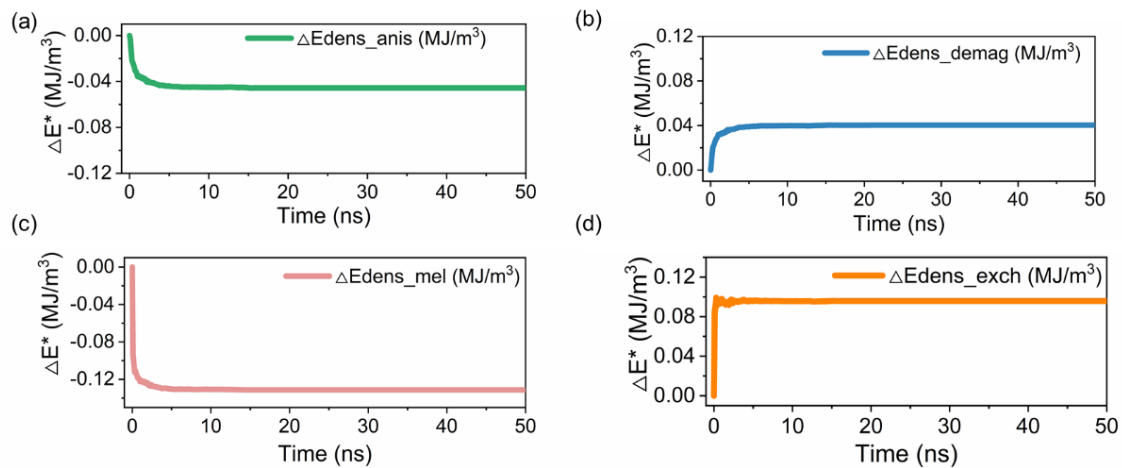

**Fig. S7** Temporal evolution of the energy density changes relative to their initial states under nonuniform strain: (a) magnetocrystalline anisotropy energy density, (b) demagnetization energy density, (c) magnetoelastic coupling energy density, and (d) exchange energy density.

**Supplementary Note 8: Dynamic evolution of skyrmions under sinusoidal nonuniform strain and sinusoidal nonuniform  $K_1$ , respectively.**

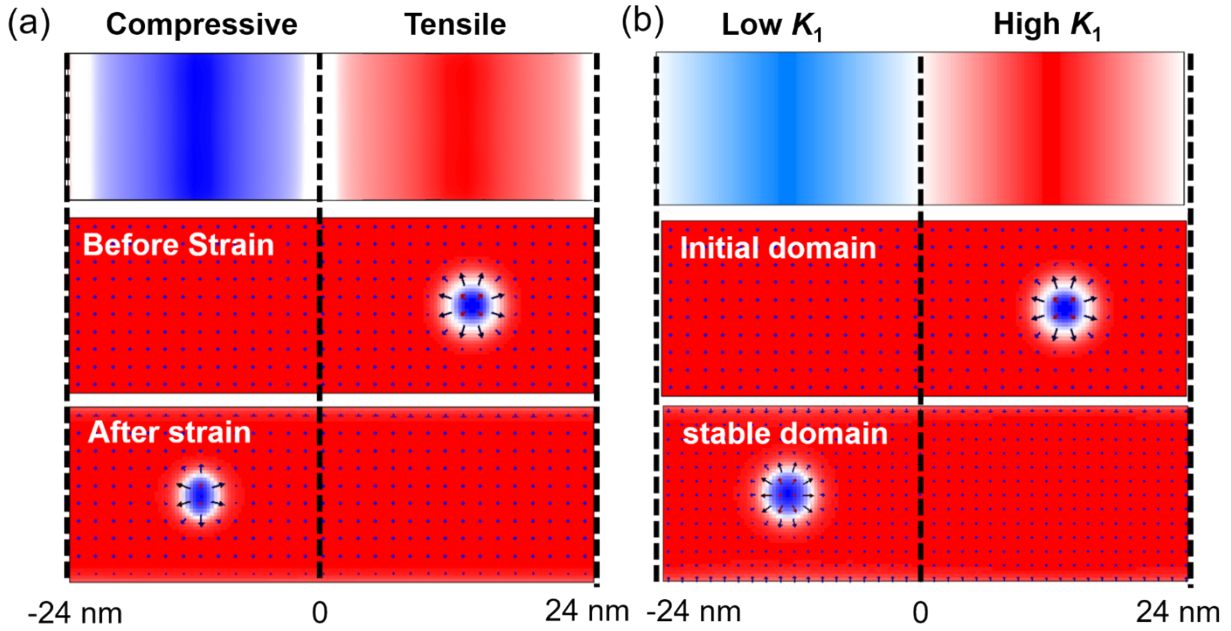

**Fig. S8** Dynamic evolution of skyrmions under (a) sinusoidal nonuniform strain and (b) sinusoidal nonuniform  $K_1$ , respectively.  $K_1 = K_0 + 0.2K_0 \times \cos(2\pi x / (48 \times 10^{-9}))$ , where  $K_0 = 1.2 \times 10^6 \text{ J/m}^3$  and  $x$  represents the horizontal distance from the center.

**Supplementary Note 9: Rearrangement Behavior 1: Enter the inner adjacent anti-nodes of the wave.**

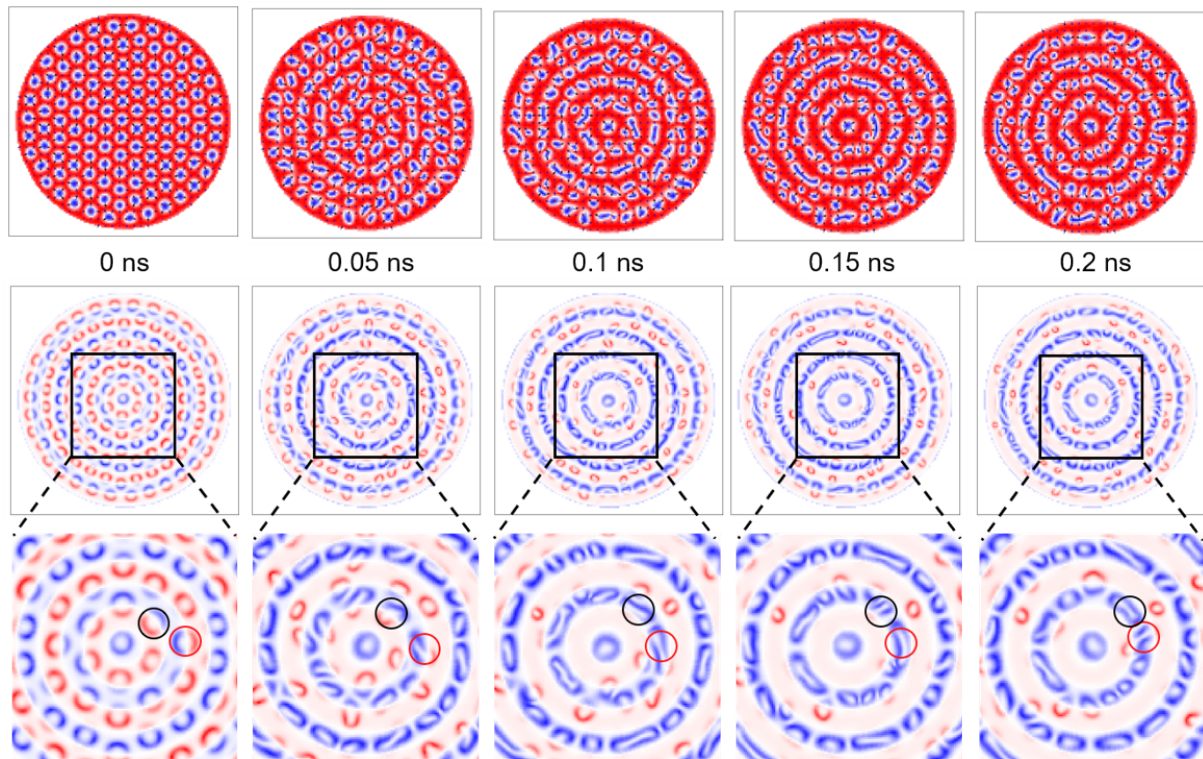

**Fig. S9** Simulate the movement behavior of skyrmions that migrate towards the anti-nodes of the inner neighboring waves following the nonuniform strain distribution.

**Supplementary Note 10: Rearrangement Behavior 2: Enter the outer adjacent anti-nodes of the wave.**

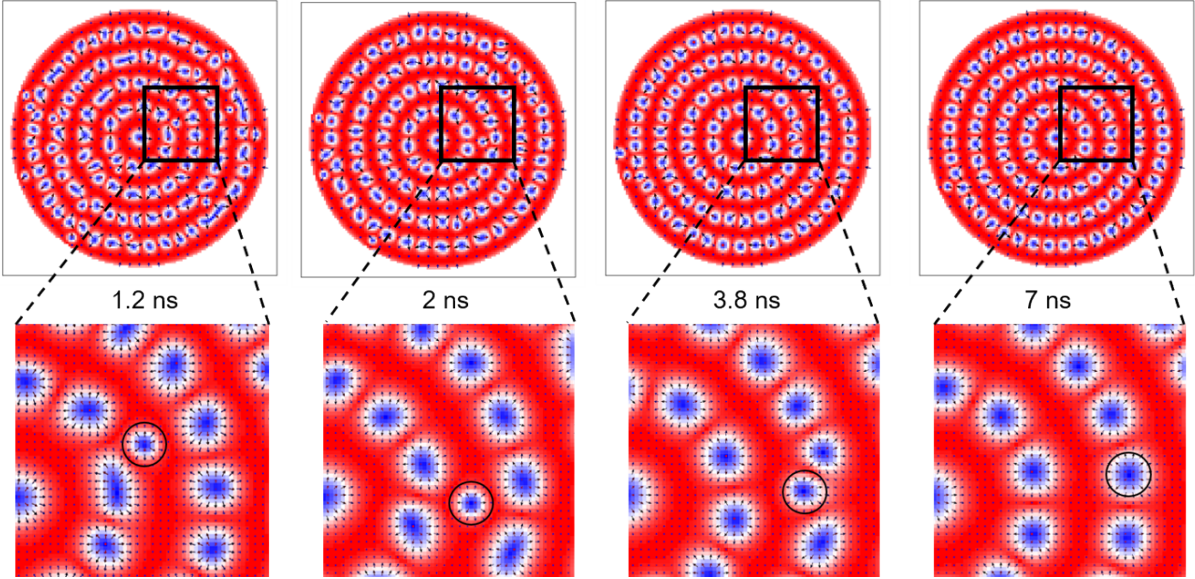

**Fig. S10** Simulate the movement behavior of skyrmions towards the anti-nodes of the outer neighboring waves following the nonuniform strain distribution.

**Supplementary Note 11: Rearrangement Behavior 3: Annihilate at the boundary of nano-islands**

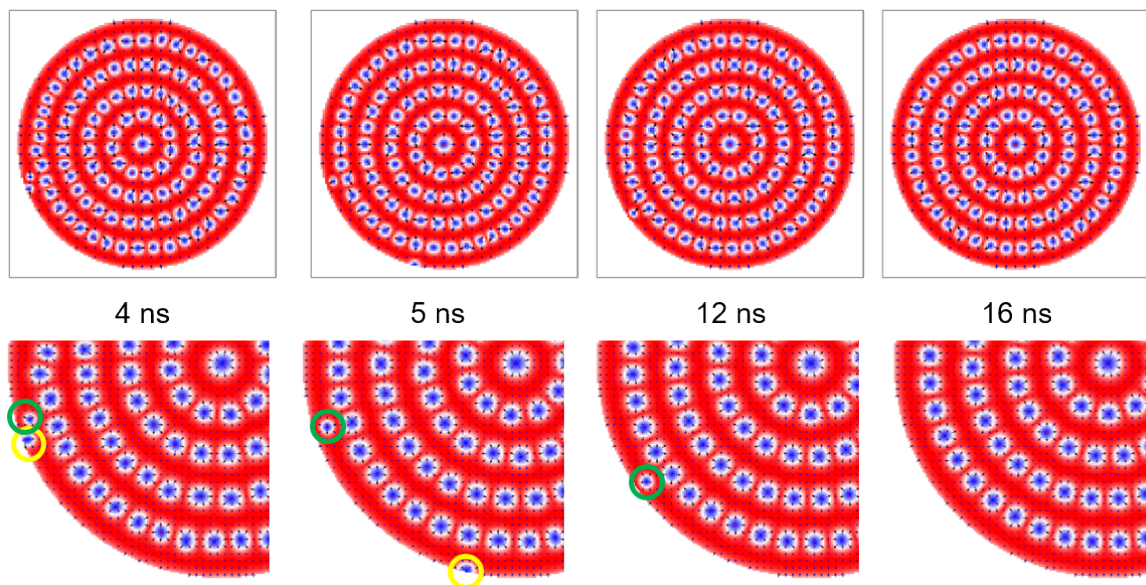

**Fig. S11** Simulate the annihilation behavior of skyrmions at the boundary following the nonuniform strain distribution.

**Supplementary Note 12: Phase diagrams of metastable domain structures under different external fields, amplitude and wavelength.**

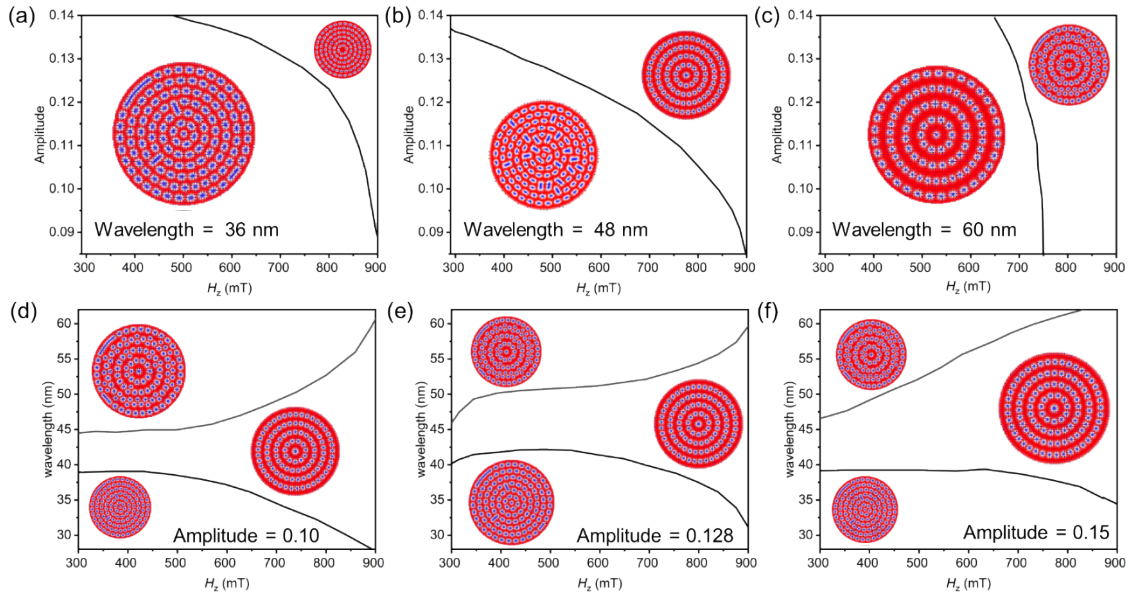

**Fig. S12** Phase diagrams of metastable domain structures. (a)–(c) Domain patterns as a function of external magnetic field and strain amplitude for (a) wavelength = 36 nm, (b) wavelength = 48 nm and (c) wavelength = 60 nm. (d)–(f) Domain patterns as a function of external magnetic field and SAW wavelength for strain amplitudes of (d)  $\varepsilon_{rr} = 0.1$ , (e)  $\varepsilon_{rr} = 0.128$  and (f)  $\varepsilon_{rr} = 0.15$ .  $\varepsilon_{rr}$  represents the radial strain

**Supplementary Note 13: Snapshots of domain structures at  $t = 9/4 T$  under different SAW frequencies.**

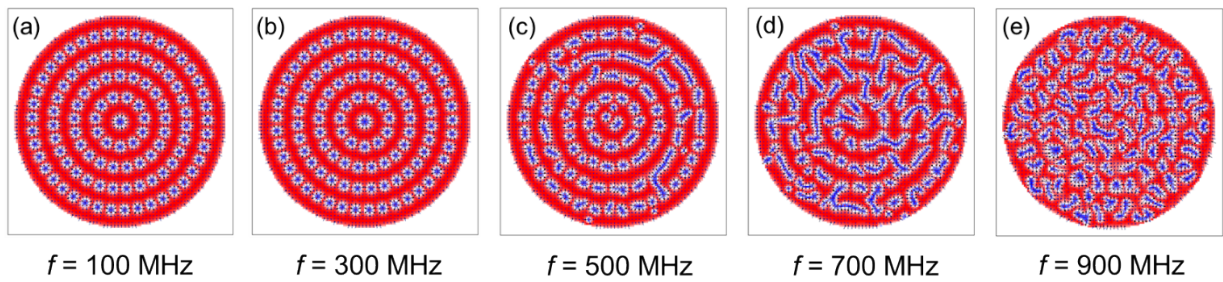

**Fig. S13** Snapshots of domain structures at  $t = 9/4 T$  under different SAW frequencies. (a)–(e) Simulated magnetization configurations for frequencies of (a)  $f = 100$  MHz, (b)  $f = 300$  MHz, (c)  $f = 500$  MHz, (d)  $f = 700$  MHz and (e)  $f = 900$  MHz.

**Supplementary Note 14: Evolution of skyrmion distribution during pulsed SAW excitation.**

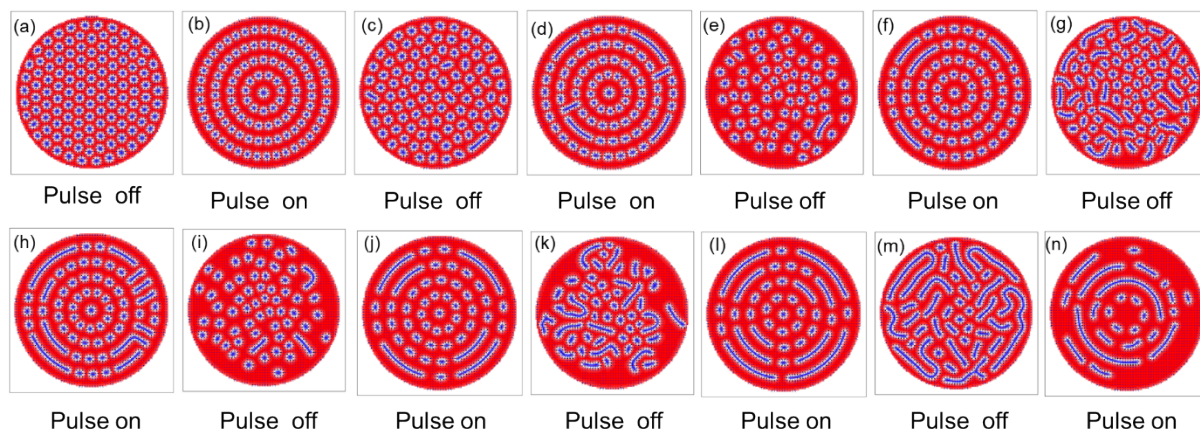

**Fig. S14** Evolution of skyrmion distribution during pulsed SAW excitation. The pulse frequency is 170 MHz, with a pulse duration of 29.4 ns (approximately 5 cycles) and an inter-pulse interval of 50 ns.

## Supplementary Information References

- 1 J. M. Hu, G. Sheng, J. X. Zhang, C. W. Nan and L. Q. Chen, *Appl. Phys. Lett.*, 2011, **98**, 112505.
- 2 J. X. Zhang and L. Q. Chen, *Acta Mater.*, 2005, **53**, 2845–2855.
- 3 J. M. Hu, T. N. Yang and L. Q. Chen, *Npj Comput. Mater.*, 2018, **4**, 62.
- 4 S. Datta, *Surface Acoustic Wave Devices*, Englewood Cliffs, N.J, 1986.
- 5 R. Sasaki, Y. Nii, Y. Iguchi and Y. Onose, *Phys. Rev. B*, 2017, **95**, 020407.
- 6 J. T. Shuai, M. N. Ali, L. Lopez-Diaz, J. E. Cunningham and T. A. Moore, *Appl. Phys. Lett.*, 2022, **120**, 252402.
- 7 S. Chikazumi, *Physics of Ferromagnetism*, Oxford University Press, Oxford, 2nd edition., 2009.
- 8 Y. Li, C. B. Zhao, W. Zhang, A. Hoffmann and V. Novosad, *APL Mater.*, 2021, **9**, 060902
- 9 F. Vanderveken, J. Mulkers, J. Leliaert, B. Van Waeyenberge, B. Sorée, O. Zografos, F. Ciubotaru and C. Adelman, *Phys. Rev. B*, 2021, **103**, 054439.
- 10 R. Chen, C. Chen, L. Han, P. Liu, R. Su, W. Zhu, Y. Zhou, F. Pan and C. Song, *Nat. Commun.*, 2023, **14**, 4427.
- 11 T. Yokouchi, S. Sugimoto, B. Rana, S. Seki, N. Ogawa, S. Kasai and Y. Otani, *Nat. Nanotechnol.*, 2020, **15**, 361–366.
- 12 M. Xu, K. Yamamoto, J. Puebla, K. Baumgaertl, B. Rana, K. Miura, H. Takahashi, D. Grundler, S. Maekawa and Y. Otani, *Sci. Adv.*, 2020, **6**, eabb1724.
- 13 J. Paskauskas, R. Rimeika and D. Ciplys, *J. Phys. Appl. Phys.*, 1995, **28**, 1419.
- 14 R. Sasaki, Y. Nii and Y. Onose, *Nat. Commun.*, 2021, **12**, 2599.
